# Supplementary material
Source: PubMed Central journal article supplement (PMC2265138)

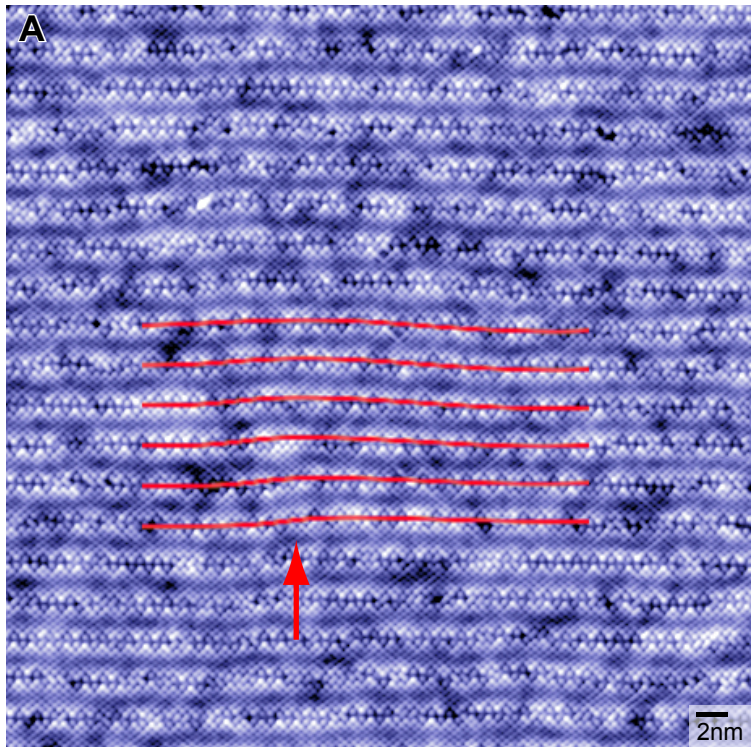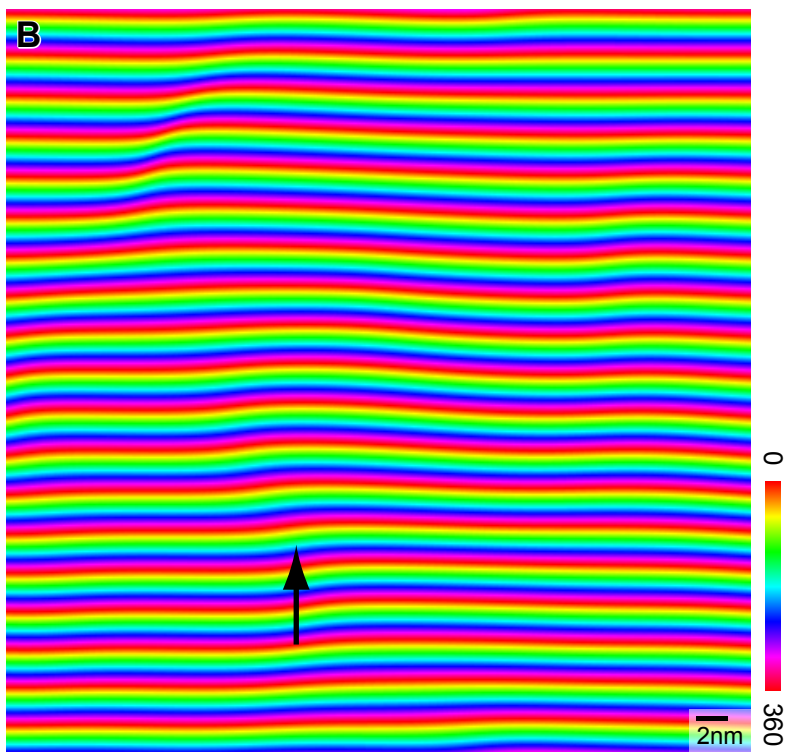

Supplement: pnas_0706795105_1.pdf [file pnas_0706795105_1.pdf]
